# Supplementary material for: Early Screening of Colorectal Precancerous Lesions Based on Combined Measurement of Multiple Serum Tumor Markers Using Artificial Neural Network Analysis
Source: MDPI journal article supplement (doi:10.3390/bios13070685), 2023-06-27
Supplement: s1 [file s1]

# Early Screening of Colorectal Precancerous Lesions Based on Combined Measurement of Multiple Serum Tumor Markers Using Artificial Neural Network Analysis

Xing Ke, Wenxue Liu, Lisong Shen, Yue Zhang, Wei Liu, Chaofu Wang and Xu Wang

**Table S1.** Matrices of true and predicted condition.

| True condition     | Predicted condition |                     |
|--------------------|---------------------|---------------------|
|                    | Predicted positive  | Predicted negative  |
| Condition positive | True positive (TP)  | False negative (FN) |
| Condition negative | False positive (FP) | True negative (TN)  |

**Table S2.** Electrochemical luminescence performance of nine tumor markers.

| Index     | Diagnostic threshold | Measuring range | LOB  | LOD | LOQ  | Unit  |
|-----------|----------------------|-----------------|------|-----|------|-------|
| CEA       | 5.2                  | 0.3-1000        | 0.3  | 0.6 | 1.8  | ng/ml |
| CA19-9    | 39                   | 2-1000          | 1.5  | 2   | 9    | U/ml  |
| CA72-4    | 6.9                  | 1.5-250         | 0.75 | 1.5 | 2.5  | U/ml  |
| Cyfra21-1 | 3.3                  | 0.1-500         | 0.1  | 0.3 | 0.5  | ng/ml |
| CA242     | 20                   | 0.5 - 200       | 0.5  | 1.5 | 2    | U/ml  |
| CA125     | 35                   | 0.6-5000        | 0.6  | 1.2 | 2.0  | U/ml  |
| AFP       | 5.8                  | 0.75-1000       | 0.75 | 1.5 | 2.25 | IU/ml |
| CA153     | 25                   | 1.5-300         | 1    | 1.5 | 3    | U/ml  |
| SCC       | 1.5                  | 0.1-70          | 0.1  | 0.2 | 0.6  | ng/ml |

LOB: Limit of blank; LOD: Limit of detection; LOQ: Limit of quantitation.

**Table S3.** Diagnostic efficiency of univariate marker to distinguish between normal healthy and abnormal groups.

| Set            | Index     | AUC  | Standard error | 95% CI    | P        |
|----------------|-----------|------|----------------|-----------|----------|
| Training set   | CEA       | 0.83 | 0.033          | 0.77-0.90 | 0.000 ** |
|                | CA19-9    | 0.77 | 0.039          | 0.69-0.85 | 0.000 ** |
|                | CA72-4    | 0.72 | 0.043          | 0.64-0.81 | 0.000 ** |
|                | Cyfra21-1 | 0.67 | 0.048          | 0.58-0.77 | 0.001 ** |
|                | CA242     | 0.62 | 0.051          | 0.52-0.72 | 0.015 *  |
|                | CA153     | 0.57 | 0.056          | 0.46-0.68 | 0.098    |
|                | AFP       | 0.49 | 0.052          | 0.39-0.60 | 0.458    |
|                | CA125     | 0.49 | 0.051          | 0.39-0.59 | 0.438    |
| Validation set | SCC       | 0.44 | 0.058          | 0.33-0.56 | 0.839    |
|                | CA19-9    | 0.76 | 0.062          | 0.64-0.89 | 0.001 ** |
|                | Cyfra21-1 | 0.70 | 0.073          | 0.56-0.85 | 0.009 ** |
|                | CA125     | 0.70 | 0.070          | 0.56-0.84 | 0.009 ** |
|                | CEA       | 0.69 | 0.071          | 0.56-0.83 | 0.010 ** |
|                | CA242     | 0.65 | 0.077          | 0.50-0.80 | 0.036 *  |
|                | CA72-4    | 0.57 | 0.077          | 0.42-0.72 | 0.214    |
|                | SCC       | 0.55 | 0.097          | 0.36-0.74 | 0.298    |
| Total cases    | AFP       | 0.51 | 0.080          | 0.36-0.67 | 0.565    |
|                | CA153     | 0.48 | 0.085          | 0.36-0.65 | 0.419    |
|                | CEA       | 0.79 | 0.032          | 0.73-0.85 | 0.000 ** |
|                | CA19-9    | 0.77 | 0.033          | 0.70-0.83 | 0.000 ** |
|                | CYFRA21-1 | 0.68 | 0.040          | 0.60-0.76 | 0.000 ** |
|                | CA72-4    | 0.68 | 0.038          | 0.60-0.75 | 0.000 ** |
|                | CA242     | 0.63 | 0.042          | 0.54-0.71 | 0.003 ** |
|                | CA125     | 0.58 | 0.042          | 0.49-0.66 | 0.049 *  |
|                | CA153     | 0.56 | 0.046          | 0.47-0.65 | 0.112    |
|                | AFP       | 0.50 | 0.043          | 0.42-0.59 | 0.503    |
|                | SCC       | 0.47 | 0.049          | 0.38-0.57 | 0.704    |

\* $P < 0.05$ , \*\* $P < 0.001$ , the difference was statistically significant. AUC: area under the receiver operating characteristic curve; CI: confidence interval.

**Table S4.** Diagnostic efficiency of univariate marker to distinguish benign diseases and early-stage colorectal cancer (CRC) from normal healthy subjects.

| Group                              | Index     | AUC  | Standard error | 95% CI    | P       | Cut-off | Sensitivity | Specificity | PPV | NPV |
|------------------------------------|-----------|------|----------------|-----------|---------|---------|-------------|-------------|-----|-----|
| Benign disease                     | CEA       | 0.74 | 0.045          | 0.65-0.83 | 0.000** | 1.66    | 71%         | 66%         | 67% | 70% |
|                                    | CA19-9    | 0.70 | 0.049          | 0.61-0.80 | 0.000** | 12.15   | 53%         | 87%         | 80% | 65% |
|                                    | SCC       | 0.62 | 0.064          | 0.49-0.74 | 0.969   |         |             |             |     |     |
|                                    | CA125     | 0.60 | 0.060          | 0.48-0.71 | 0.957   |         |             |             |     |     |
|                                    | CA72-4    | 0.57 | 0.052          | 0.47-0.67 | 0.084   |         |             |             |     |     |
|                                    | Cyfra21-1 | 0.52 | 0.065          | 0.39-0.65 | 0.377   |         |             |             |     |     |
|                                    | CA153     | 0.51 | 0.059          | 0.40-0.63 | 0.581   |         |             |             |     |     |
|                                    | AFP       | 0.50 | 0.054          | 0.39-0.60 | 0.465   |         |             |             |     |     |
|                                    | CA242     | 0.48 | 0.058          | 0.37-0.60 | 0.609   |         |             |             |     |     |
| Early-stage CRC                    | CA19-9    | 0.75 | 0.078          | 0.60-0.90 | 0.001** | 9.86    | 72%         | 72%         | 72% | 72% |
|                                    | CYFRA21-1 | 0.71 | 0.079          | 0.55-0.86 | 0.004** | 2.19    | 67%         | 75%         | 73% | 69% |
|                                    | CA72-4    | 0.65 | 0.073          | 0.51-0.80 | 0.020*  | 1.52    | 83%         | 54%         | 65% | 76% |
|                                    | CEA       | 0.65 | 0.082          | 0.49-0.81 | 0.031*  | 2.83    | 44%         | 87%         | 77% | 61% |
|                                    | SCC       | 0.75 | 0.103          | 0.54-0.95 | 0.988   |         |             |             |     |     |
|                                    | CA125     | 0.63 | 0.095          | 0.44-0.81 | 0.054   |         |             |             |     |     |
|                                    | CA242     | 0.61 | 0.078          | 0.46-0.76 | 0.079   |         |             |             |     |     |
|                                    | AFP       | 0.57 | 0.077          | 0.42-0.72 | 0.817   |         |             |             |     |     |
|                                    | CA153     | 0.53 | 0.083          | 0.37-0.69 | 0.346   |         |             |             |     |     |
| Benign disease and early-stage CRC | CEA       | 0.72 | 0.042          | 0.64-0.81 | 0.000** | 0.26    | 62%         | 77%         | 73% | 67% |
|                                    | CA19-9    | 0.72 | 0.043          | 0.63-0.80 | 0.000** | 9.64    | 73%         | 71%         | 71% | 72% |
|                                    | SCC       | 0.65 | 0.057          | 0.54-0.76 | 0.995   | 0.75    | 43%         | 31%         | 39% | 35% |
|                                    | CA72-4    | 0.60 | 0.047          | 0.51-0.69 | 0.022*  | 1.73    | 54%         | 59%         | 57% | 56% |
|                                    | CYFRA21-1 | 0.59 | 0.054          | 0.48-0.69 | 0.055   |         |             |             |     |     |
|                                    | CA242     | 0.53 | 0.053          | 0.43-0.63 | 0.29    |         |             |             |     |     |
|                                    | CA125     | 0.53 | 0.054          | 0.42-0.63 | 0.706   |         |             |             |     |     |
|                                    | AFP       | 0.52 | 0.050          | 0.42-0.61 | 0.617   |         |             |             |     |     |
|                                    | CA153     | 0.50 | 0.053          | 0.39-0.60 | 0.494   |         |             |             |     |     |

\* $P < 0.05$ , \*\* $P < 0.001$ , the difference was statistically significant. AUC: area under the receiver operating characteristic curve; CI: confidence interval; PPV: positive predictive value; NPV: negative predictive value.
